# Supplementary material for: Plasma hPG80 (Circulating Progastrin) as a Novel Prognostic Biomarker for Hepatocellular Carcinoma
Source: MDPI journal article supplement (doi:10.3390/cancers14020402), 2022-01-13
Supplement: s1 [file s1]

Supplementary Materials

# Plasma hPG<sub>80</sub> (Circulating Progastrin) as a Novel Prognostic Biomarker for Hepatocellular Carcinoma

Marie Dupuy <sup>1</sup>, Sarah Iltache <sup>1</sup>, Benjamin Rivière <sup>1</sup>, Alexandre Prieur <sup>2</sup>, George Philippe Pageaux <sup>1</sup>, José Ursic Bedoya <sup>1</sup>, Stéphanie Faure <sup>1</sup>, Heloïse Guillaumée <sup>1</sup> and Eric Assenat <sup>1,\*</sup>

<sup>1</sup> Department of Medical Oncology, CNRS UMR 5535 St-Elloi University Hospital Montpellier, School of Medicine, 34295 Montpellier, France; m-dupuy@chu-montpellier.fr (M.D.); sarah.iltache@gmail.com (S.I.); b-riviere@chu-montpellier.fr (B.R.); gp-pageaux@chu-montpellier.fr (G.P.P.); j-ursicbedoya@chu-montpellier.fr (J.U.B.); s-faure@chu-montpellier.fr (S.F.); h-guillaumee@chu-montpellier.fr (H.G.)  
<sup>2</sup> ECS-Progastrin, 1004 Lausanne, Switzerland; a.prieur@ecs-progastrin.com  
 \* Correspondence: e-assenat@chu-montpellier.fr

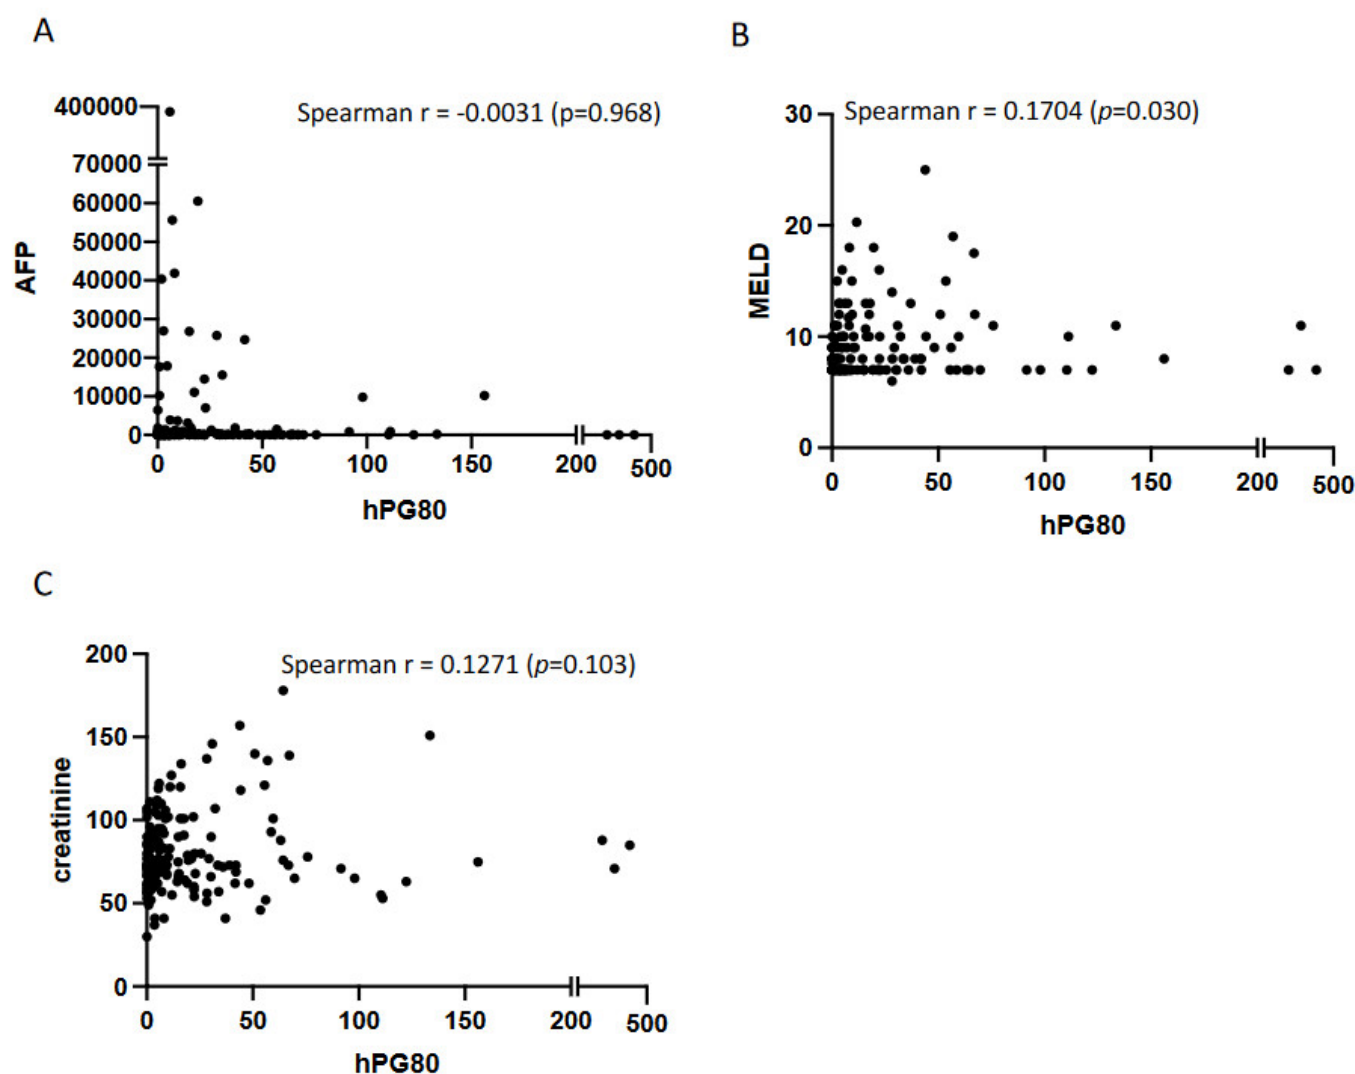

**Figure S1.** Scatter plots of hPG<sub>80</sub> and AFP, MELD and creatinine in HCC patients. (A) Correlation between hPG<sub>80</sub> and AFP levels in HCC patients was evaluated by the Spearman correlation coefficient. (B) Correlation between hPG<sub>80</sub> and MELD levels in HCC patients was evaluated by the

Spearman correlation coefficient. (C) Correlation between hPG<sub>80</sub> and creatinine levels in HCC patients was evaluated by the Spearman correlation coefficient.

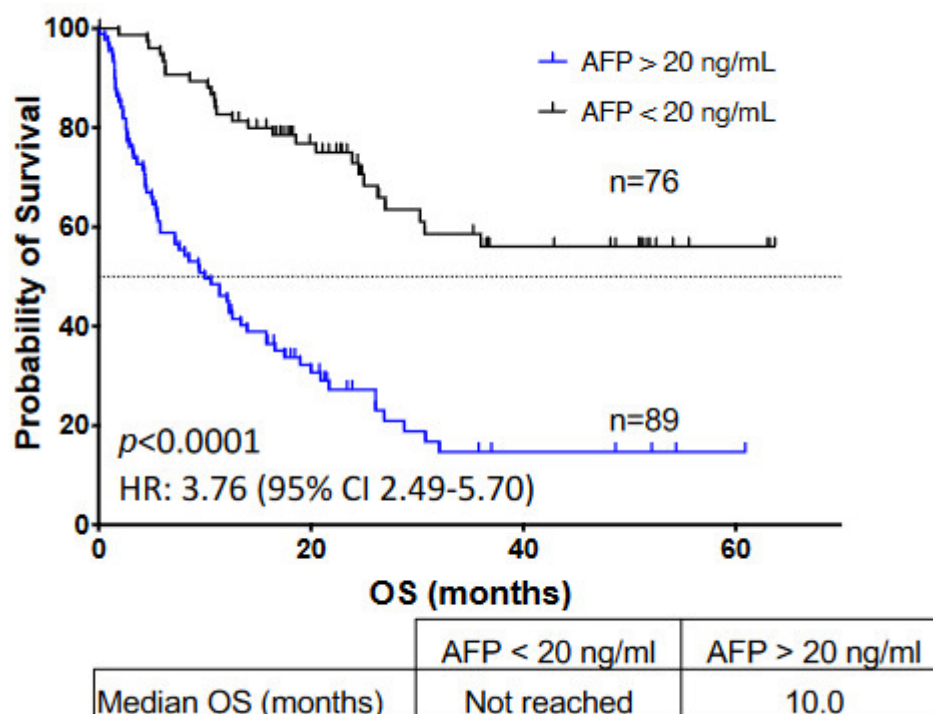

**Figure S2.** Overall survival of HCC patients according to AFP levels. Kaplan-Meier analysis of OS for HCC patients according to AFP levels (cutoff: 20 ng/mL; AFP < 20 ng/mL:  $n = 76$ ; AFP > 20 ng/mL:  $n = 89$ ). The  $p$  values, hazard ratios (HR) and 95% confidence intervals are indicated.

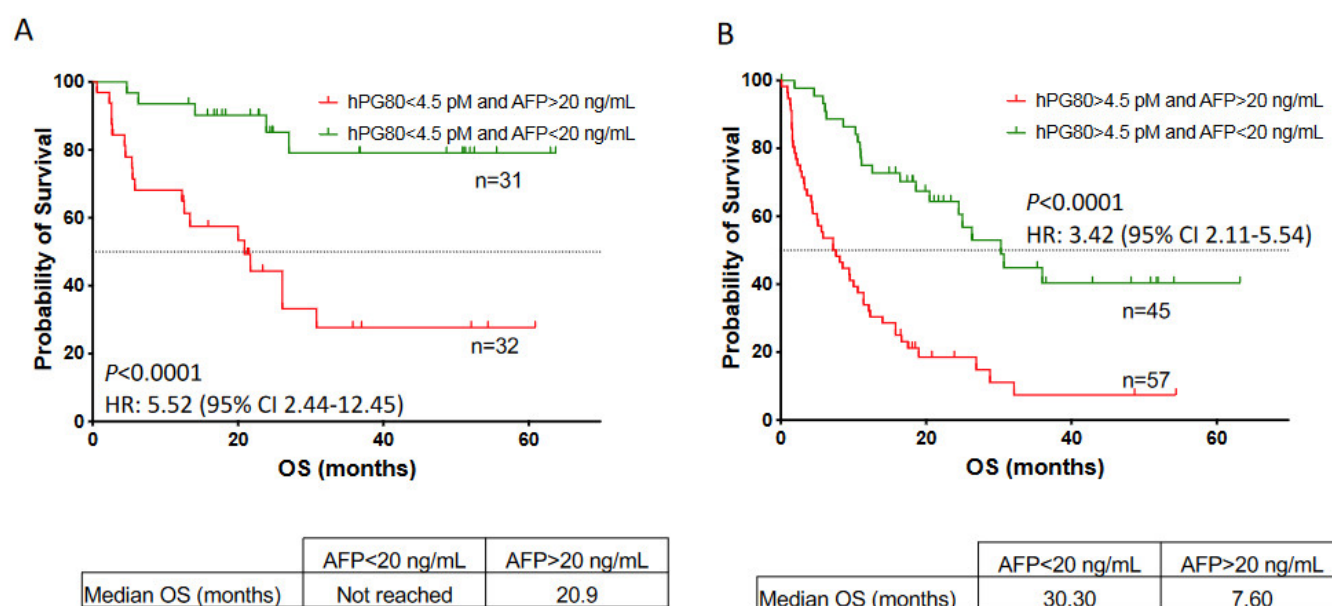

**Figure S3.** Overall survival of HCC patients based on combined hPG<sub>80</sub> and AFP levels. (A) Kaplan-Meier analysis of OS for HCC patients with low hPG<sub>80</sub> levels (hPG<sub>80</sub> < 4.5 pM;  $n = 63$ ) according to AFP levels (cutoff: 20 ng/mL; AFP < 20 ng/mL:  $n = 31$ ; AFP > 20 ng/mL:  $n = 32$ ). (B) Kaplan-Meier

analysis of OS for HCC patients with high hPG<sub>80</sub> levels (hPG<sub>80</sub> > 4.5 pM;  $n = 102$ ) according to AFP levels (cutoff: 20 ng/mL; AFP < 20 ng/mL:  $n = 45$ ; AFP > 20 ng/mL:  $n = 57$ ). The  $p$  values, hazard ratios (HR) and 95% confidence intervals are indicated.

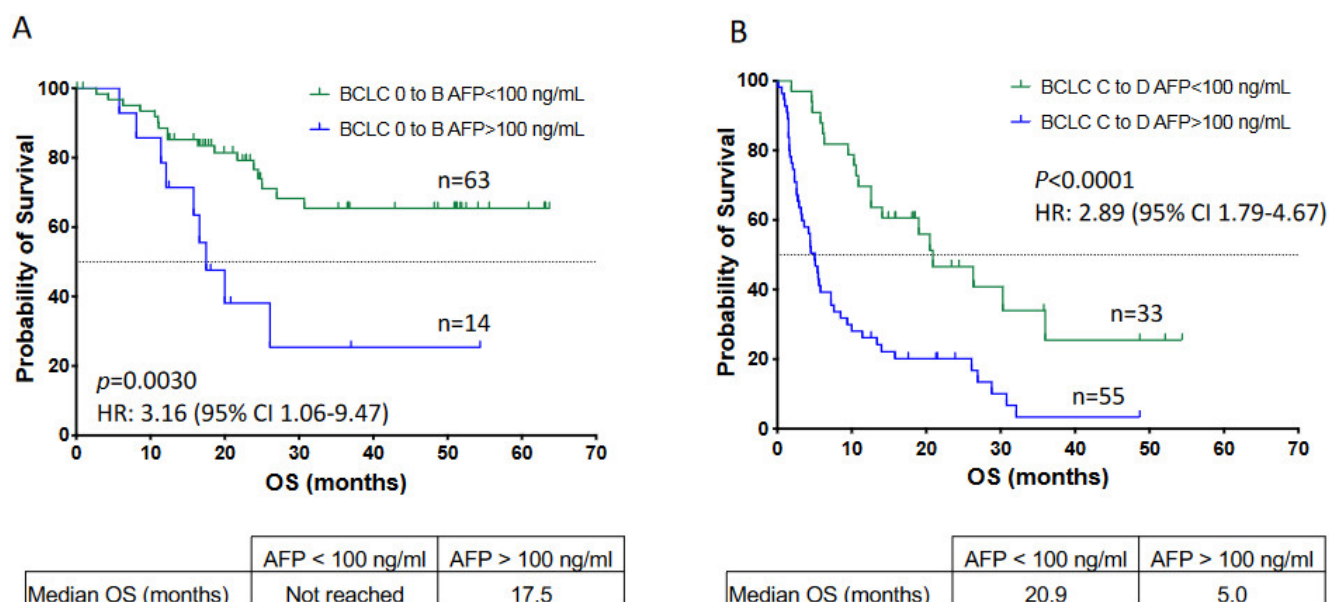

**Figure S4.** Overall survival of HCC patients depending on the BCLC stages according to AFP levels. (A) Kaplan-Meier analysis of OS for HCC patients with very early to intermediate BCLC stages (BCLC 0 to B,  $n = 77$ ) according to AFP levels. Patients were divided into two groups based on AFP levels (cutoff: 100 ng/mL; AFP < 100 ng/mL:  $n = 63$ ; AFP > 100 ng/mL:  $n = 14$ ). (B) Kaplan-Meier analysis of OS for HCC patients with advanced to terminal BCLC stages (BCLC C to D,  $n = 88$ ) according to AFP levels. Patients were divided into two groups based on AFP levels (cutoff: 100 ng/mL; AFP < 100 ng/mL:  $n = 33$ ; AFP > 100 ng/mL:  $n = 55$ ).

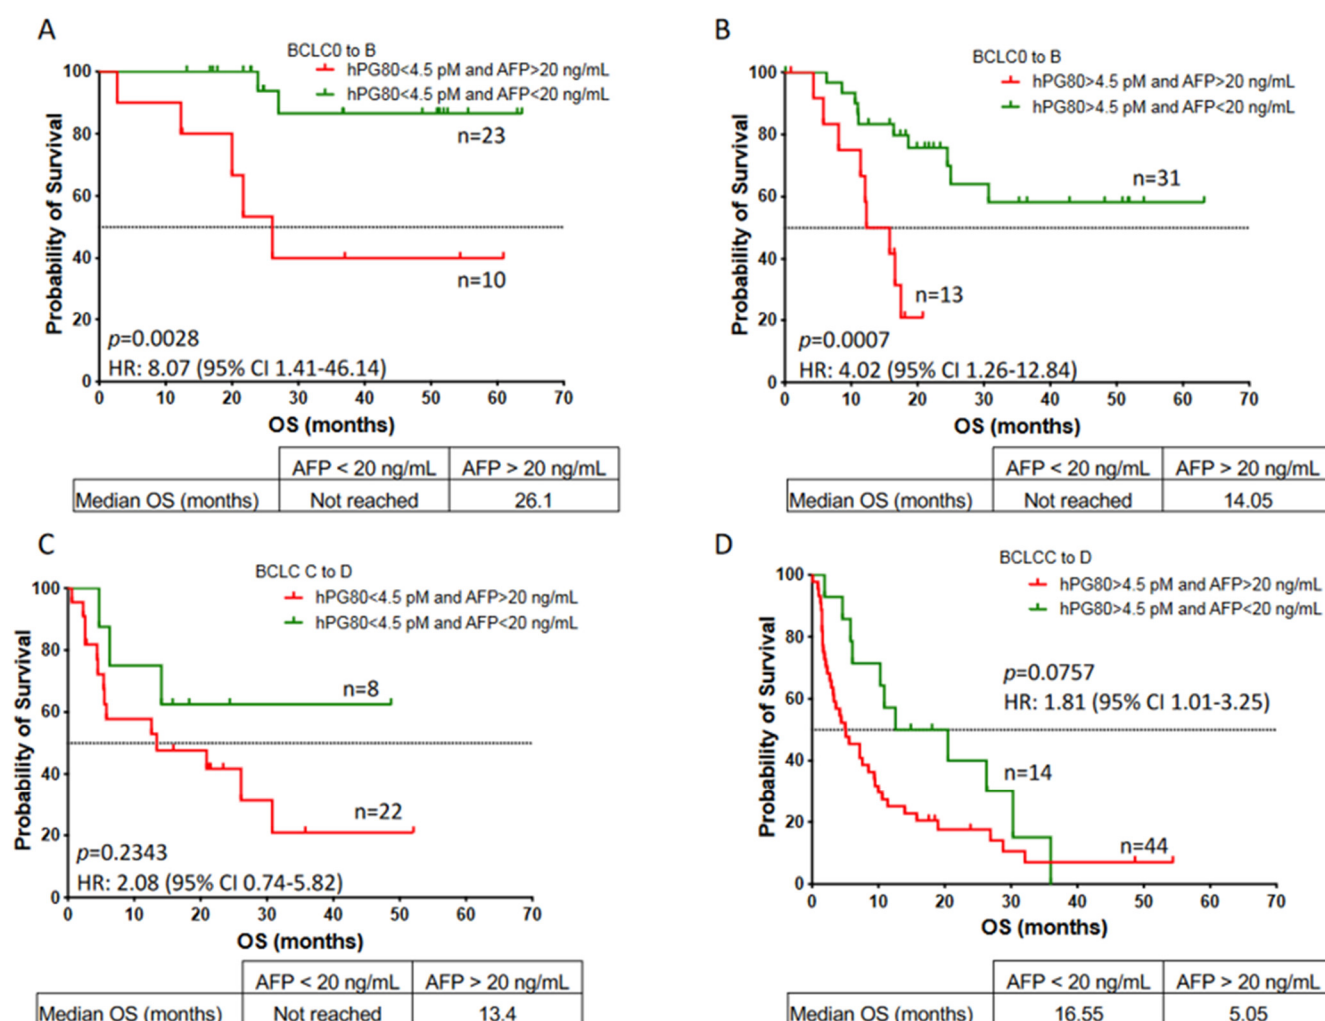

**Figure S5.** Overall survival of HCC patients with early to intermediate BCLC stages (BCLC 0 to B) and with advanced to terminal BCLC stages (BCLC C to D) according to hPG<sub>80</sub> alone or in combination with AFP levels at 20 ng/mL. **(A)** Kaplan-Meier analysis of OS for HCC patients with BCLC 0 to B and low hPG<sub>80</sub> levels (hPG<sub>80</sub> < 4.5 pM) ( $n = 33$ ) according to AFP levels. Patients were divided into two groups based on AFP levels (cutoff: 20 ng/mL; AFP < 20 ng/mL:  $n = 23$ ; AFP > 20 ng/mL:  $n = 10$ ). **(B)** Kaplan-Meier analysis of OS for HCC patients with BCLC 0 to B and high hPG<sub>80</sub> levels (hPG<sub>80</sub> > 4.5 pM) ( $n = 44$ ) according to AFP levels. Patients were divided into two groups based on AFP levels (cutoff: 20 ng/mL; AFP < 20 ng/mL:  $n = 31$ ; AFP > 100 ng/mL:  $n = 13$ ). **(C)** Kaplan-Meier analysis of OS for HCC patients with BCLC C to D and low hPG<sub>80</sub> levels (hPG<sub>80</sub> < 4.5 pM) ( $n = 30$ ) according to AFP levels. Patients were divided into two groups based on AFP levels (cutoff: 20 ng/mL; AFP < 20 ng/mL:  $n = 8$ ; AFP > 20 ng/mL:  $n = 22$ ). **(D)** Kaplan-Meier analysis of OS for HCC patients with very BCLC C to D and high hPG<sub>80</sub> levels (hPG<sub>80</sub> > 4.5 pM) ( $n = 58$ ) according to AFP levels. Patients were divided into two groups based on AFP levels (cutoff: 20 ng/mL; AFP < 20 ng/mL:  $n = 14$ ; AFP > 20 ng/mL:  $n = 44$ ). The  $p$  values, hazard ratios (HR) and 95% confidence intervals are indicated.

**Table S1.** Clinical and pathological characteristics for the training and validation cohorts.

|                     |                     | Training Cohort     | Validation Cohort   |
|---------------------|---------------------|---------------------|---------------------|
|                     |                     | N (%)               | N(%)                |
|                     |                     | <i>n</i> = 84       | <i>n</i> = 84       |
| Age, years          | Median (range)      | 66 (27–85)          | 68 (45–84)          |
| Gender              | Male                | 74 (88.1%)          | 75 (89.3%)          |
|                     | Female              | 10 (11.9%)          | 9 (10.7%)           |
| Laboratory values   |                     |                     |                     |
| hPG <sub>80</sub>   | Median (IQR), pM    | 8.79 (2.93–21.94)   | 6.31 (2.40–31.85)   |
|                     | Mean (SE), pM       | 16.77 (2.26)        | 34.27 (7.92)        |
| AFP                 | Median (IQR), ng/mL | 27.80 (5.00–825.50) | 41.05 (6.39–479.50) |
|                     | Mean (SE), ng/mL    | 7006 (4663)         | 3196 (975)          |
| Etiology            |                     |                     |                     |
| NASH                | Y                   | 9 (10.7%)           | 22 (26.2%)          |
|                     | N                   | 75 (89.3%)          | 62 (73.8%)          |
| Alcohol consumption | Y                   | 52 (61.9%)          | 55 (65.5%)          |
|                     | N                   | 32 (38.1%)          | 29 (34.5%)          |
| Hepatitis B virus   | Y                   | 8 (9.5%)            | 5 (6.0%)            |
|                     | N                   | 76 (90.5%)          | 79 (94.0%)          |
| Hepatitis C virus   | Y                   | 28 (33.3%)          | 17 (20.2%)          |
|                     | N                   | 56 (66.7%)          | 67 (79.8%)          |
| Cirrhosis           | Y                   | 73 (86.9%)          | 65 (77.4%)          |
|                     | N                   | 11 (13.1%)          | 19 (22.6%)          |
| BCLC                | 0                   | 9 (10.7%)           | 1 (1.25%)           |
|                     | A                   | 18 (21.4%)          | 16 (19.0%)          |
|                     | B                   | 17 (20.2%)          | 18 (21.4%)          |
|                     | C                   | 38 (45.2%)          | 48 (57.1%)          |
|                     | D                   | 2 (2.5%)            | 1 (1.25%)           |

Abbreviations, AFP: alpha-fetoprotein; IQR: interquartile range; SE: standard error; BCLC: Barcelona Clinic Liver Center; NASH: nonalcoholic steatohepatitis.
